# Supplementary material for: Selective AKT kinase inhibitor capivasertib in combination with fulvestrant in PTEN-mutant ER-positive metastatic breast cancer
Source: PubMed Central journal article supplement (PMC8052445; doi:10.1038/s41523-021-00251-7), 2021-04-16
Supplement: 41523_2021_251_MOESM1_ESM.pdf [file 41523_2021_251_MOESM1_ESM.pdf]

**Selective AKT kinase inhibitor capivasertib in combination with fulvestrant in *PTEN*-mutant ER-positive metastatic breast cancer**

**Supplementary material**

**Supplementary Table 1. Estrogen and progesterone receptor status by site of disease**

| No. of patients<br>(N=31) | Site of disease |             |             |
|---------------------------|-----------------|-------------|-------------|
|                           | Primary         | Metastatic  | Unknown     |
| 15                        | –               | ER+ and PR+ | –           |
| 10                        | ER+ and PR+     | –           | –           |
| 3                         | –               | ER+ and PR- | –           |
| 1                         | PR+             | ER+         | –           |
| 1                         | –               | ER+         | PR unknown  |
| 1                         | –               | –           | ER+ and PR+ |

ER+, estrogen receptor positive; PR+, progesterone receptor positive

**Supplementary Table 2. Number of patients experiencing AEs, and dose modifications and discontinuations due to AEs and serious AEs, during treatment with capivasertib and fulvestrant**

| <i>n</i> (%)                                      | Fulvestrant<br>naïve<br>( <i>N</i> =12) | Fulvestrant<br>pretreated<br>( <i>N</i> =19) | Total<br>( <i>N</i> =31) |
|---------------------------------------------------|-----------------------------------------|----------------------------------------------|--------------------------|
| AE of any grade causally related to capivasertib  | 11 (91.7)                               | 18 (94.7)                                    | 29 (93.5)                |
| Any AE of grade ≥3                                | 6 (50.0)                                | 11 (57.9)                                    | 17 (54.8)                |
| Any AE leading to death                           | 0                                       | 0                                            | 0                        |
| Any AE leading to discontinuation of capivasertib | 0                                       | 1 (5.3) <sup>1</sup>                         | 1 (3.2)                  |
| Any AE leading to dose reduction of capivasertib  | 0                                       | 1 (5.3) <sup>2</sup>                         | 1 (3.2)                  |
| Any serious AE                                    | 6 (50.0)                                | 5 (26.3)                                     | 11 (35.5)                |
| Any causally related serious AE                   | 1 (8.3)                                 | 2 (10.5)                                     | 3 (9.7)                  |

<sup>1</sup>Drug hypersensitivity; <sup>2</sup>Diarrhea. AE, adverse event

## Supplementary Figure 1. Study consort diagram

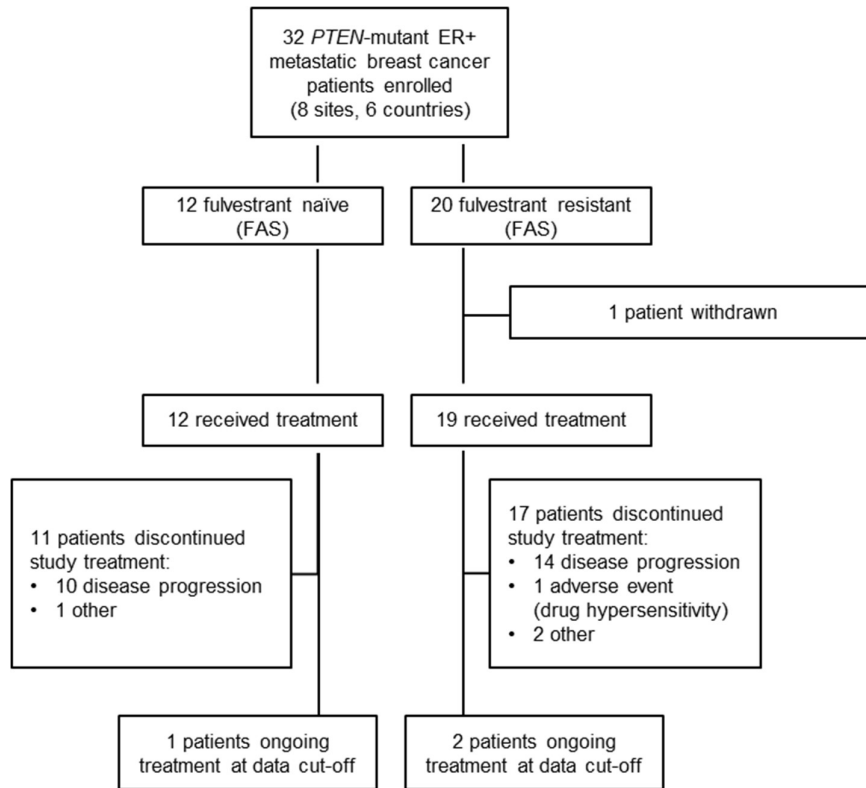

ER+, estrogen receptor positive; FAS, full analysis set
